# Supplementary material for: Efficient Cr3+-activated NaInP2O7 phosphor for broadband near-infrared LED applications
Source: Royal Society of Chemistry journal article supplement (doi:10.1039/d2qi00794k), 2022-01-01
Supplement: d2qi00794k1.pdf [file d2qi00794k1.pdf]

## Supporting Information

### Efficient Cr<sup>3+</sup>-activated NaInP<sub>2</sub>O<sub>7</sub> phosphor for broadband near-infrared LED applications

Qi Wang,<sup>a,b,c</sup> Shangwei Wang<sup>a,c</sup> Tao Tan,<sup>a</sup> Jiutian Wang,<sup>a</sup> Ran Pang,<sup>\*a</sup> Da Li,<sup>a</sup>

Chengyu Li<sup>\*a,c</sup> and Hongjie Zhang<sup>a</sup>

<sup>a</sup> State key Laboratory of Rare Earth Resource Utilization, Changchun Institute of Applied Chemistry, Chinese Academy of Sciences, Changchun 130022, P. R. China

<sup>b</sup> Faculty of Materials Metallurgy and Chemistry, Jiangxi University of Science and Technology, Ganzhou, Jiangxi 341000, P.R. China

<sup>c</sup> Ganjiang Innovation Academy, Chinese Academy of Sciences, Ganzhou 341000, P. R. China

\* Corresponding author: Tel: +86-0431-85262258

E-mail address: [cyli@ciac.ac.cn](mailto:cyli@ciac.ac.cn) and [pangran@ciac.ac.cn](mailto:pangran@ciac.ac.cn)

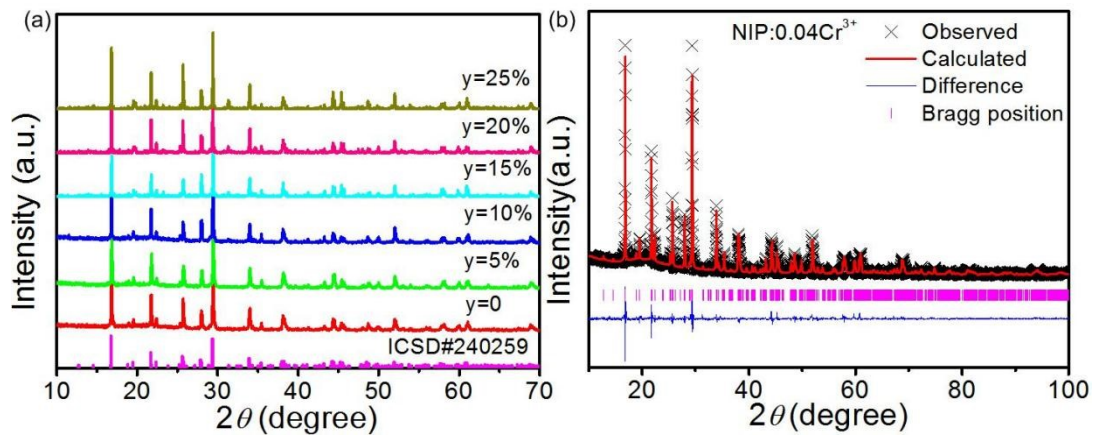

**Fig. S1** (a) XRD patterns of NIP:0.04Cr<sup>3+</sup>+yLi<sub>2</sub>CO<sub>3</sub> (y = 0-25%) and the NIP ICSD standard pattern. (b) Rietveld refinement of NIP:0.04Cr<sup>3+</sup> sample.

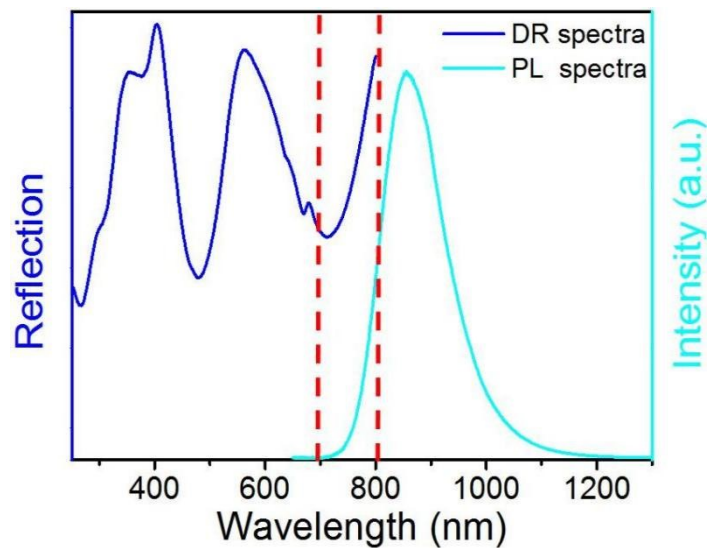

**Fig. S2** DR and PL spectra of NIP:0.04Cr<sup>3+</sup>.

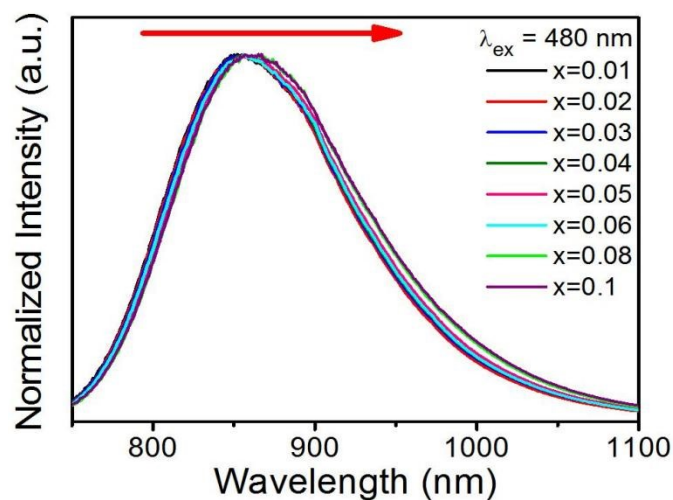

**Fig. S3** Normalized PL spectra of NIP:xCr<sup>3+</sup> (x = 0.01-0.1) samples phosphors under 480 nm excitation.

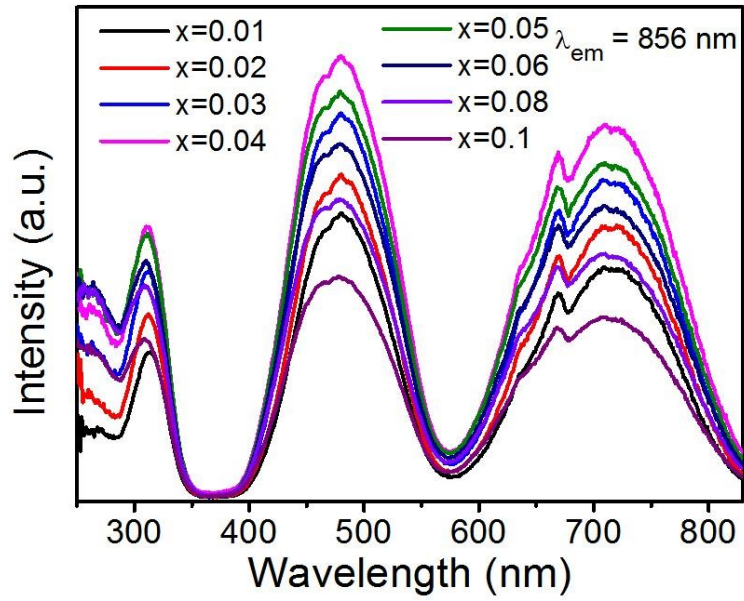

**Fig. S4** PLE ( $\lambda_{em} = 856 \text{ nm}$ ) spectra of the NIP: $x\text{Cr}^{3+}$  ( $x = 0.01-0.1$ ) samples measured at room temperature.

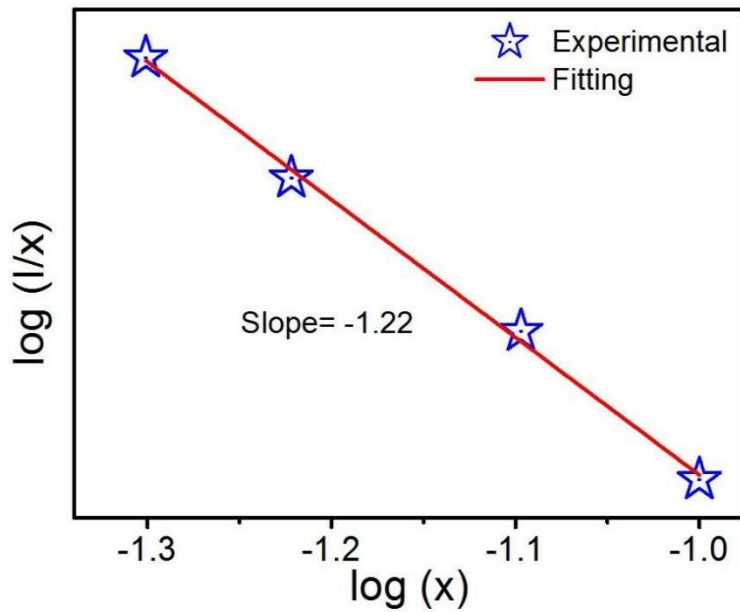

**Fig. S5** The dependence of  $\log(I/x)$  on  $\log(x)$  for NIP: $x\text{Cr}^{3+}$  ( $x = 0.05, 0.06, 0.08$  and  $0.1$ ) samples.

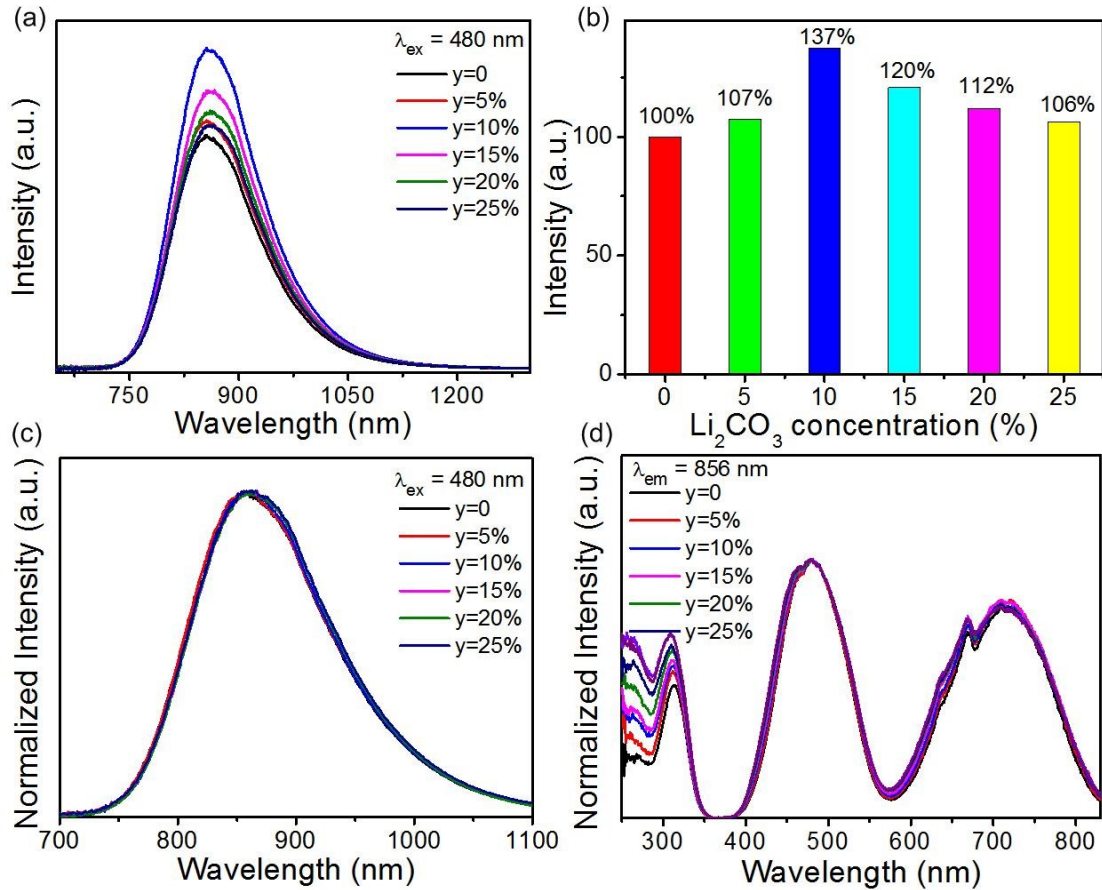

**Fig. S6** (a) and (b) The PL spectra and integral intensity ratio of the emission of NIP:0.04Cr<sup>3+</sup>+yLi<sub>2</sub>CO<sub>3</sub> (y = 0-25%) phosphors, respectively. (c) Normalized PL spectra of NIP:0.04Cr<sup>3+</sup>+yLi<sub>2</sub>CO<sub>3</sub> (y = 0-25%) phosphors under 480 nm excitation. (d) Normalized PLE ( $\lambda_{em} = 856$  nm) spectra of NIP:0.04Cr<sup>3+</sup>+yLi<sub>2</sub>CO<sub>3</sub> (y = 0-25%) phosphors.

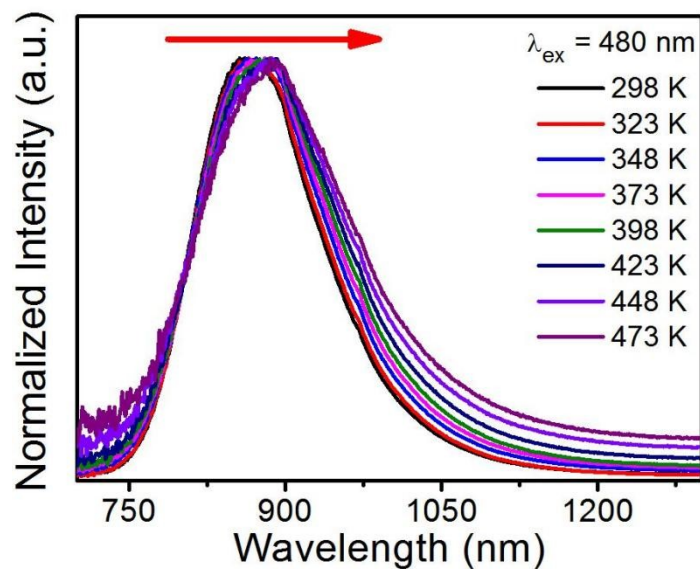

**Fig. S7** Normalized PL spectra of NIP:0.04Cr<sup>3+</sup> phosphor under 480 nm excitation at different temperature.

**Table S1** Structural parameters of NIP determined by Rietveld refinement of the corresponding XRD pattern.

| Atom | <i>x</i> | <i>y</i> | <i>z</i> | Occ | U <sub>iso</sub> |
|------|----------|----------|----------|-----|------------------|
| Na   | 0.28287  | 0.02546  | 0.78067  | 1.0 | 0.00672          |
| In   | 0.25413  | 0.00531  | 0.25012  | 1.0 | 0.01171          |
| P1   | 0.07129  | 0.24805  | 0.95617  | 1.0 | 0.02351          |
| P2   | 0.33253  | 0.722    | 0.05464  | 1.0 | 0.01195          |
| O1   | 0.05374  | 0.08751  | 0.87003  | 1.0 | 0.00636          |
| O2   | 0.13078  | 0.64122  | 0.07593  | 1.0 | 0.00189          |
| O3   | 0.17173  | 0.24176  | 0.12999  | 1.0 | 0.00843          |
| O4   | 0.20069  | 0.13967  | 0.44798  | 1.0 | 0.05609          |
| O5   | 0.29304  | 0.72092  | 0.89136  | 1.0 | 0.00354          |
| O6   | 0.40363  | 0.59119  | 0.60111  | 1.0 | 0.03244          |
| O7   | 0.45396  | 0.59961  | 0.12881  | 1.0 | 0.01586          |

**Table S2** Structural parameters of NIP:0.04Cr<sup>3+</sup> determined by Rietveld refinement of the corresponding XRD pattern.

| Atom | <i>x</i> | <i>y</i> | <i>z</i> | Occ     | U <sub>iso</sub> |
|------|----------|----------|----------|---------|------------------|
| Na   | 0.28627  | 0.01972  | 0.7913   | 1.0     | 0.02521          |
| In   | 0.25651  | 0.00412  | 0.24934  | 0.95986 | 0.01227          |
| Cr   | 0.25651  | 0.00412  | 0.24934  | 0.04014 | 0.01227          |
| P1   | 0.07885  | 0.2489   | 0.96596  | 1.0     | 0.01329          |
| P2   | 0.33567  | 0.72341  | 0.04891  | 1.0     | 0.0139           |
| O1   | 0.05565  | 0.0771   | 0.84422  | 1.0     | 0.0192           |
| O2   | 0.12449  | 0.65589  | 0.06794  | 1.0     | 0.00163          |
| O3   | 0.1787   | 0.22918  | 0.11906  | 1.0     | 0.00741          |
| O4   | 0.18044  | 0.14651  | 0.40977  | 1.0     | 0.00132          |
| O5   | 0.28694  | 0.7085   | 0.89938  | 1.0     | 0.01094          |
| O6   | 0.38774  | 0.59976  | 0.59611  | 1.0     | 0.01291          |
| O7   | 0.46472  | 0.5919   | 0.13516  | 1.0     | 0.01442          |
